# Supplementary material for: Polygenic sex determination in the cichlid fish Astatotilapia burtoni
Source: PubMed Central journal article supplement (PMC5080751; doi:10.1186/s12864-016-3177-1), 2016-10-26

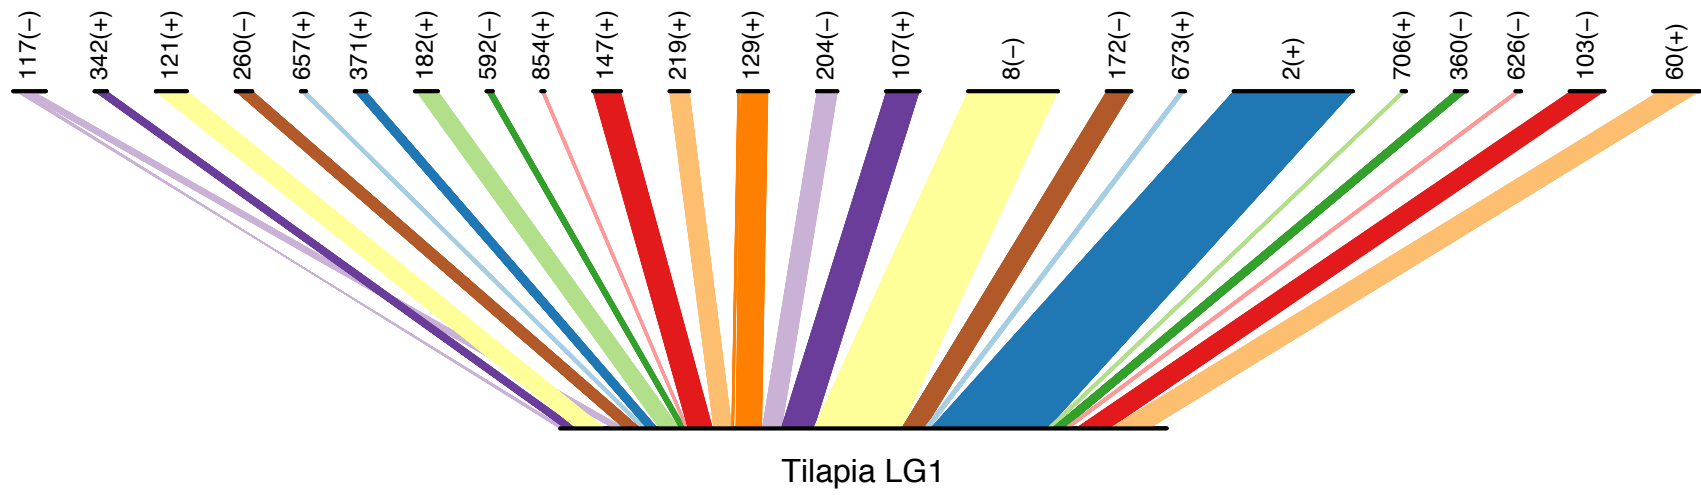

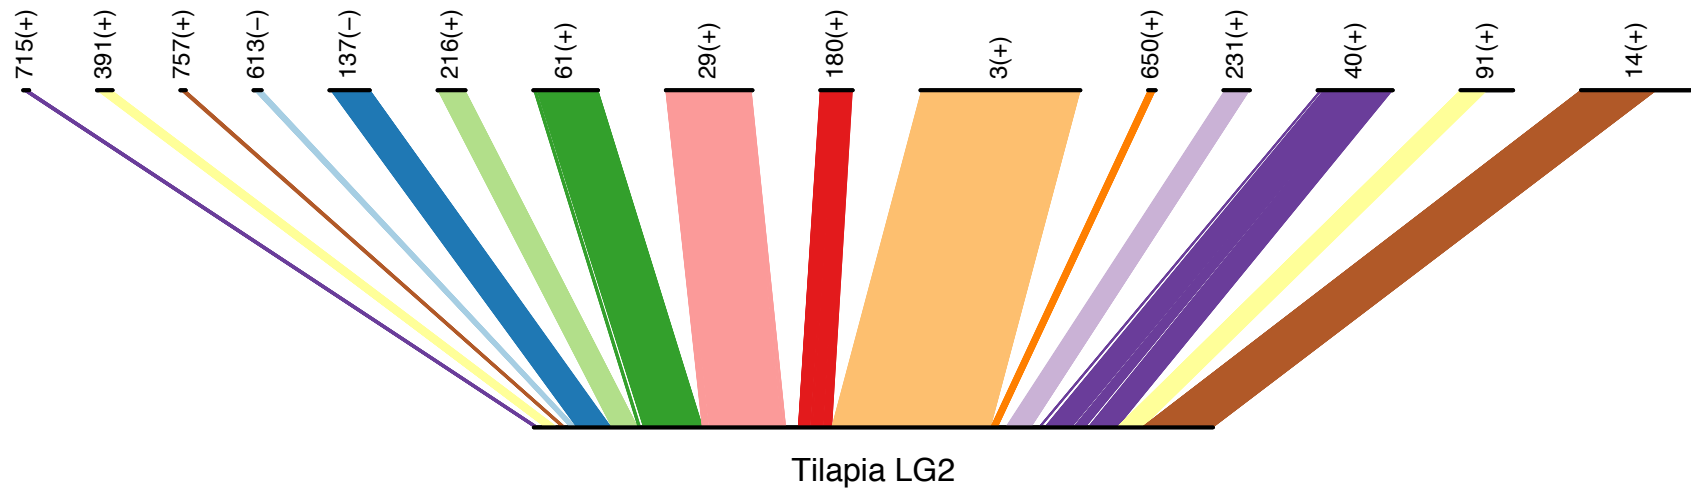

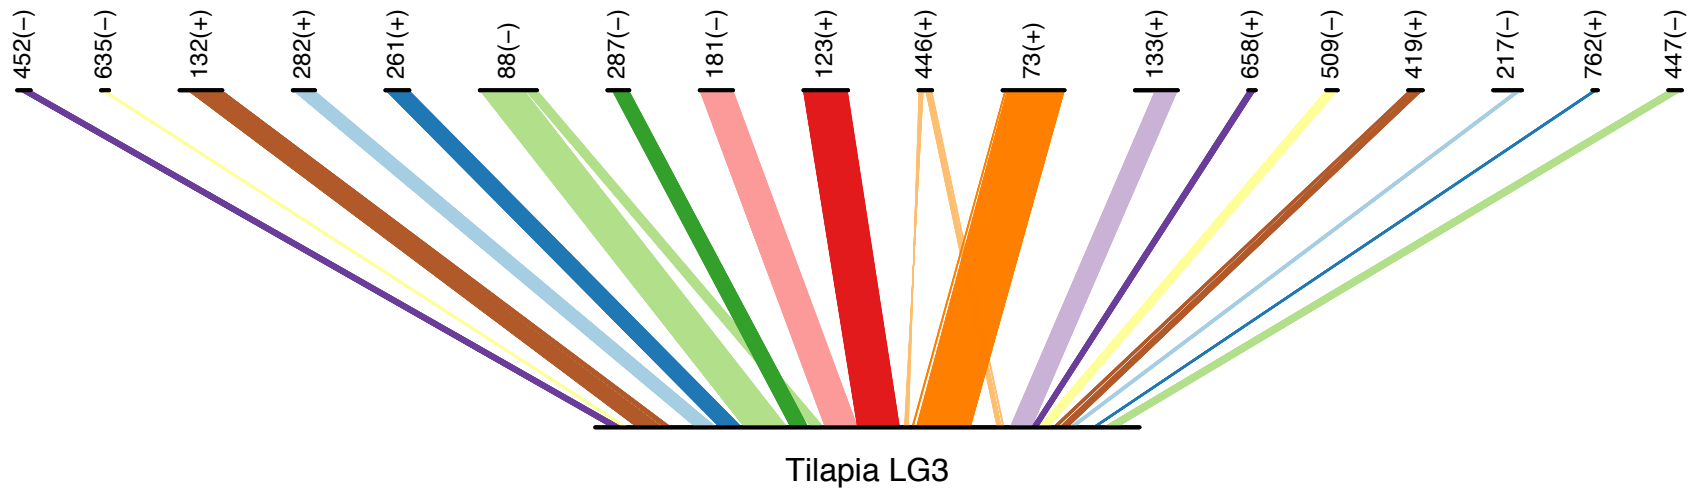

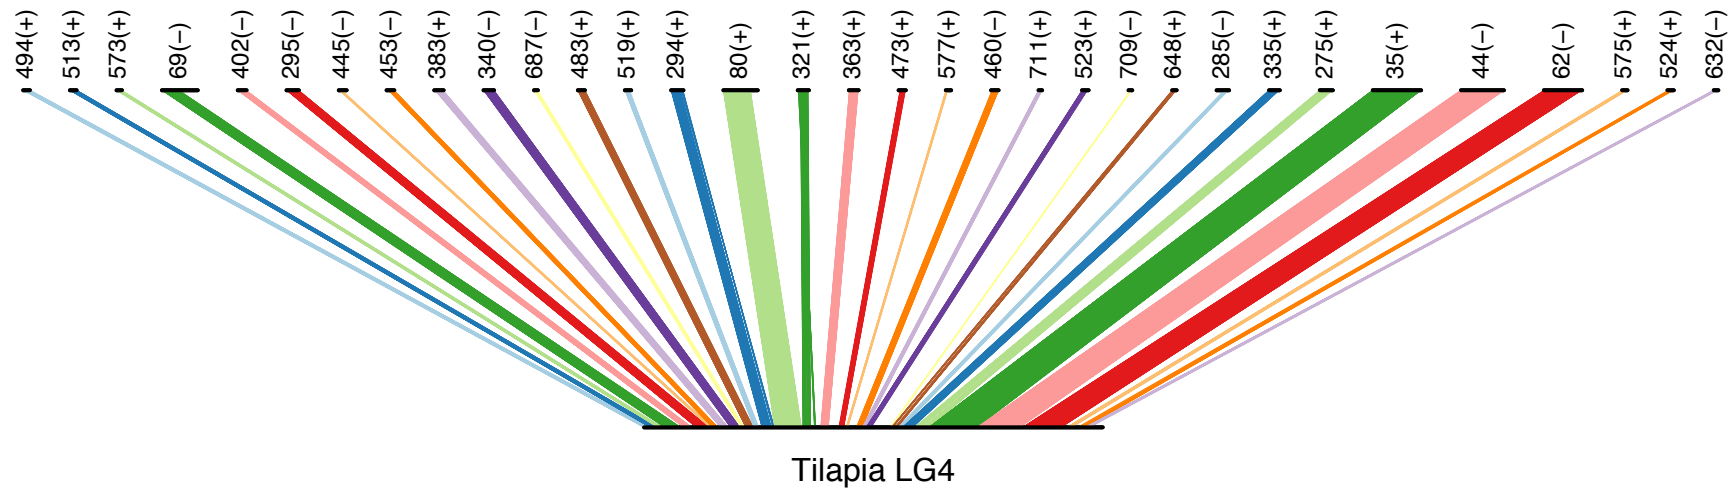

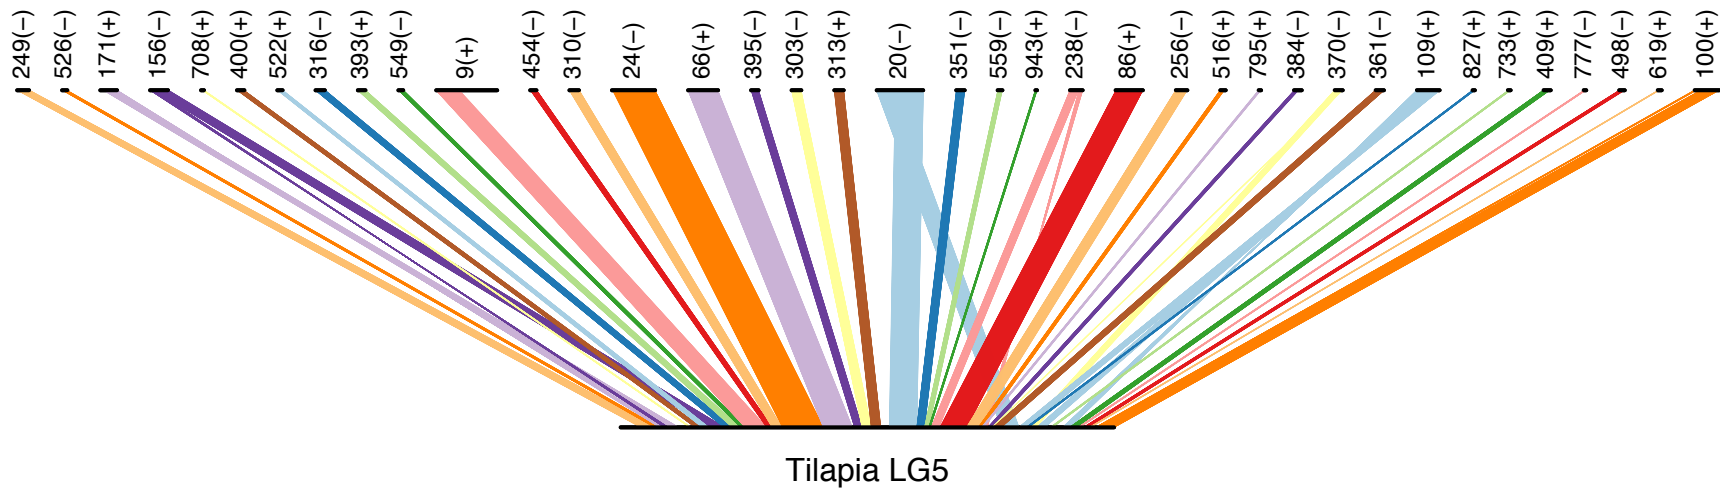

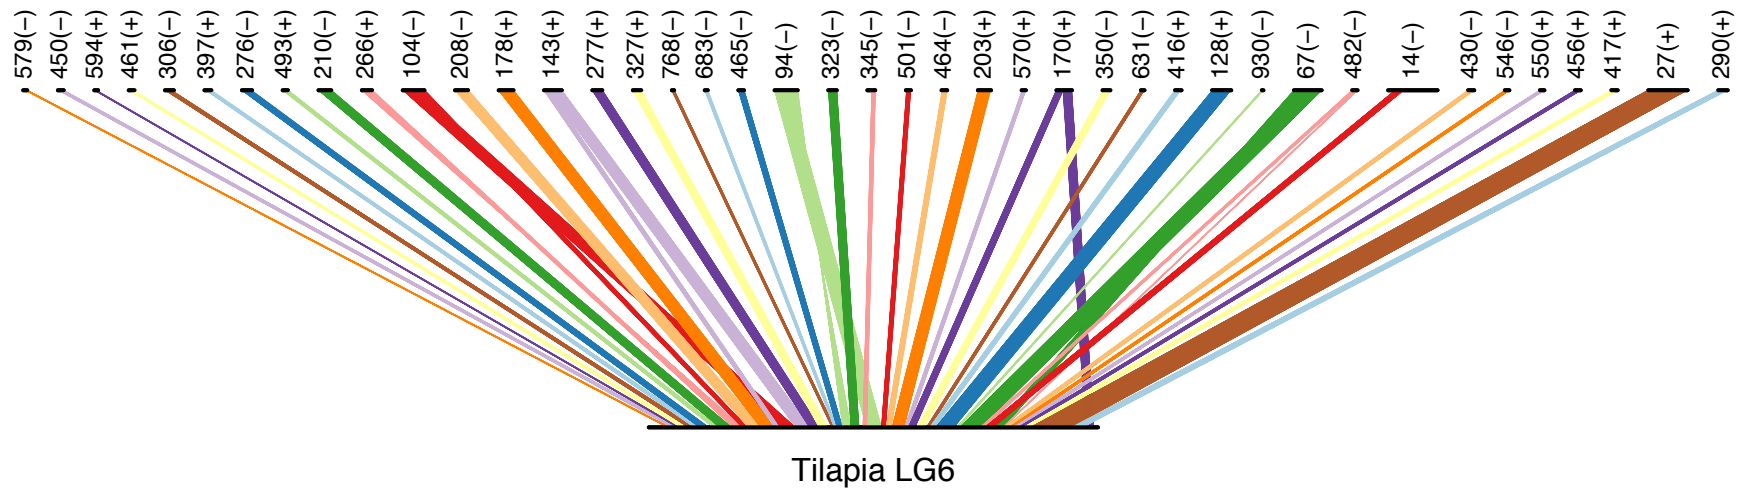

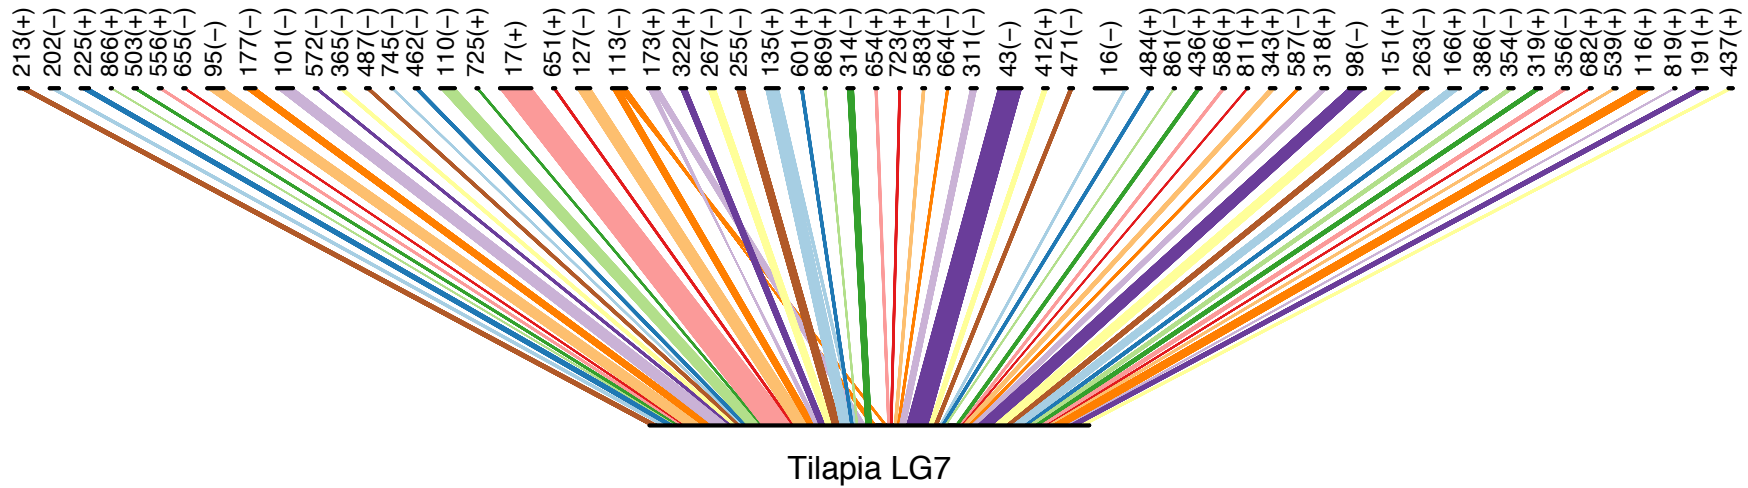

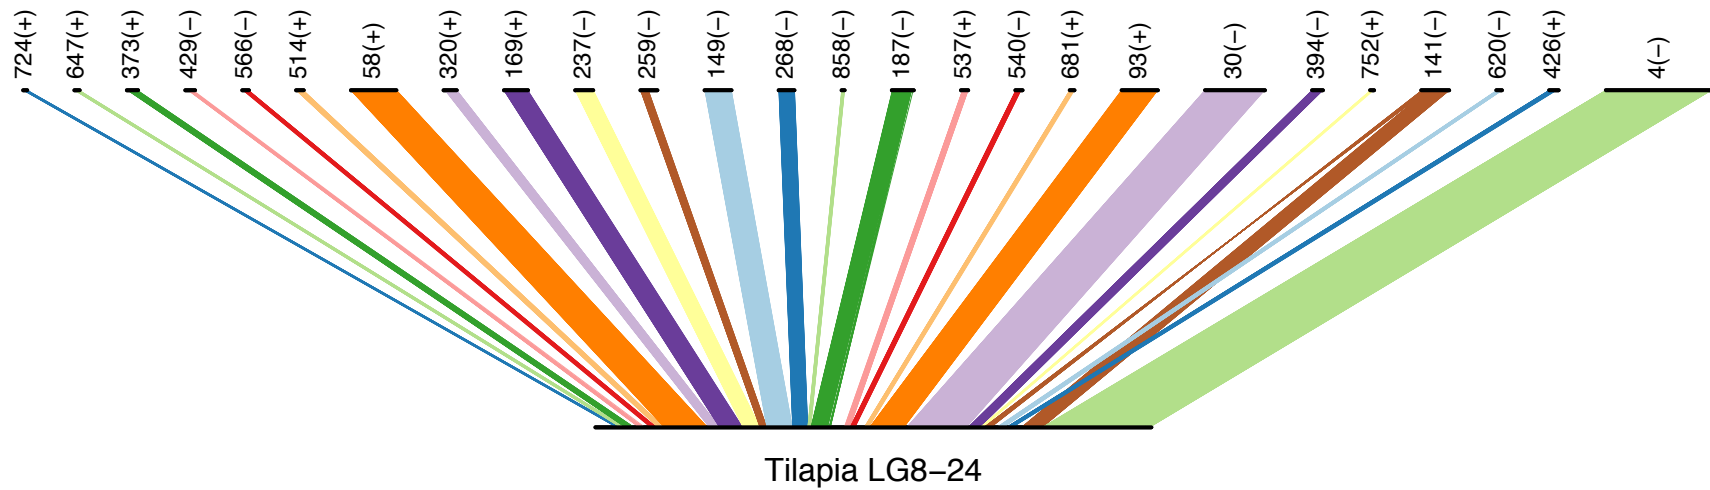



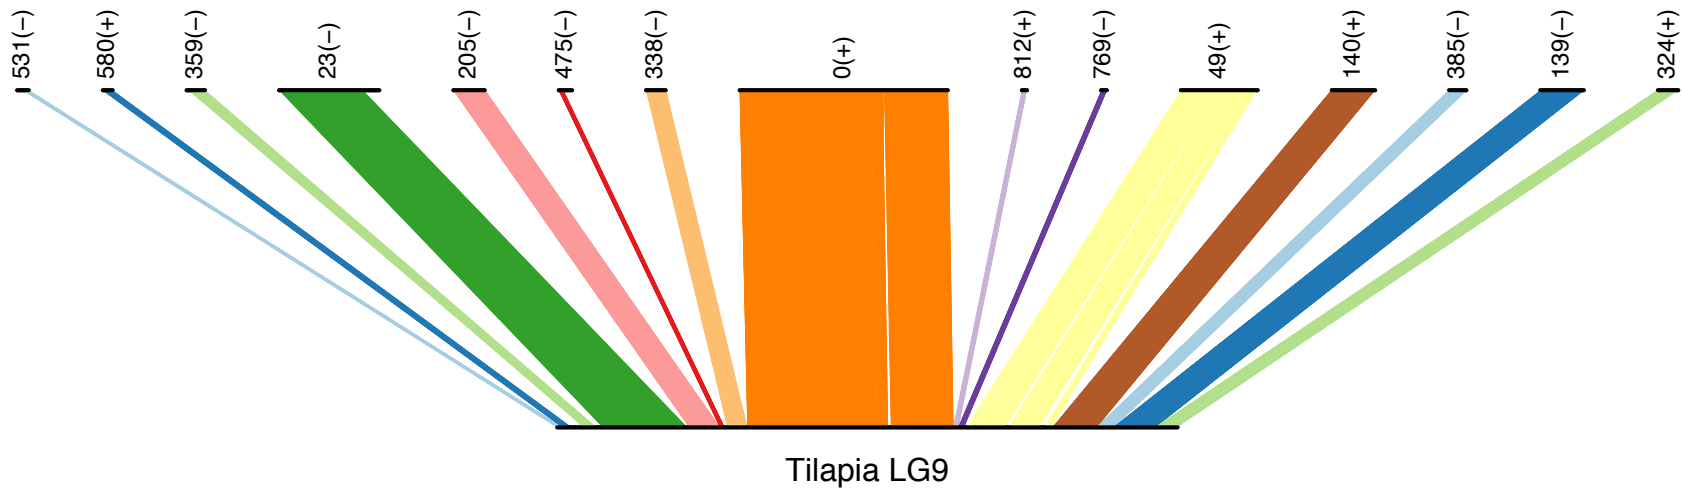

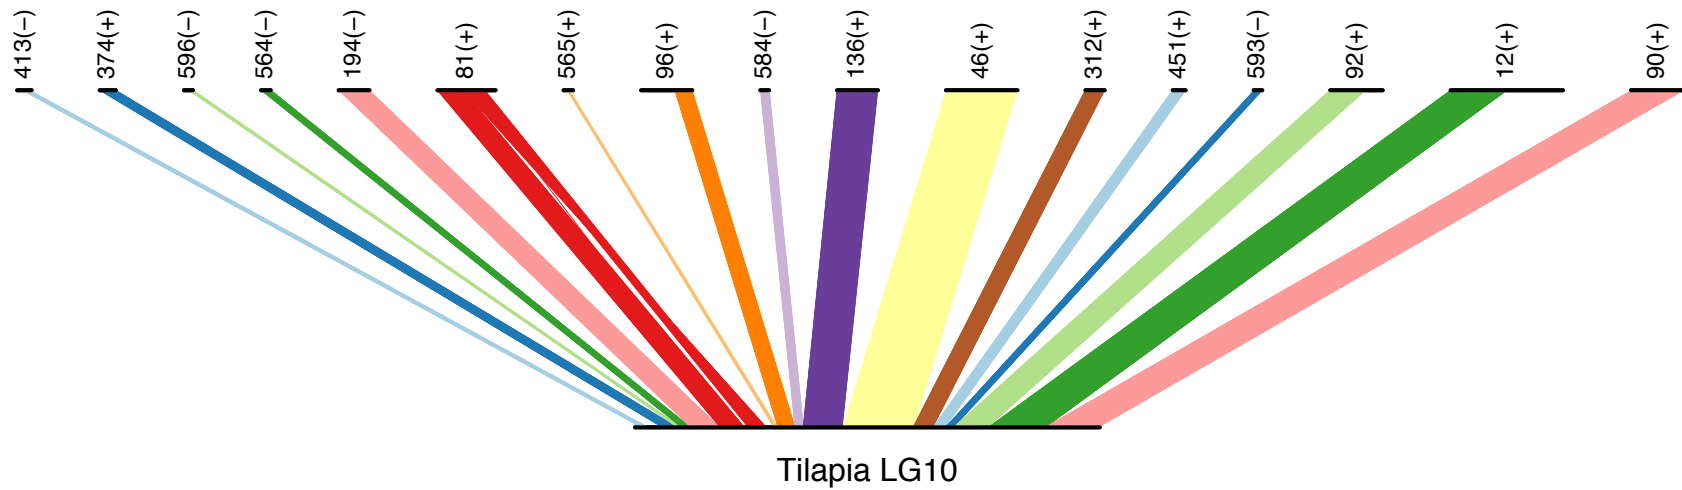

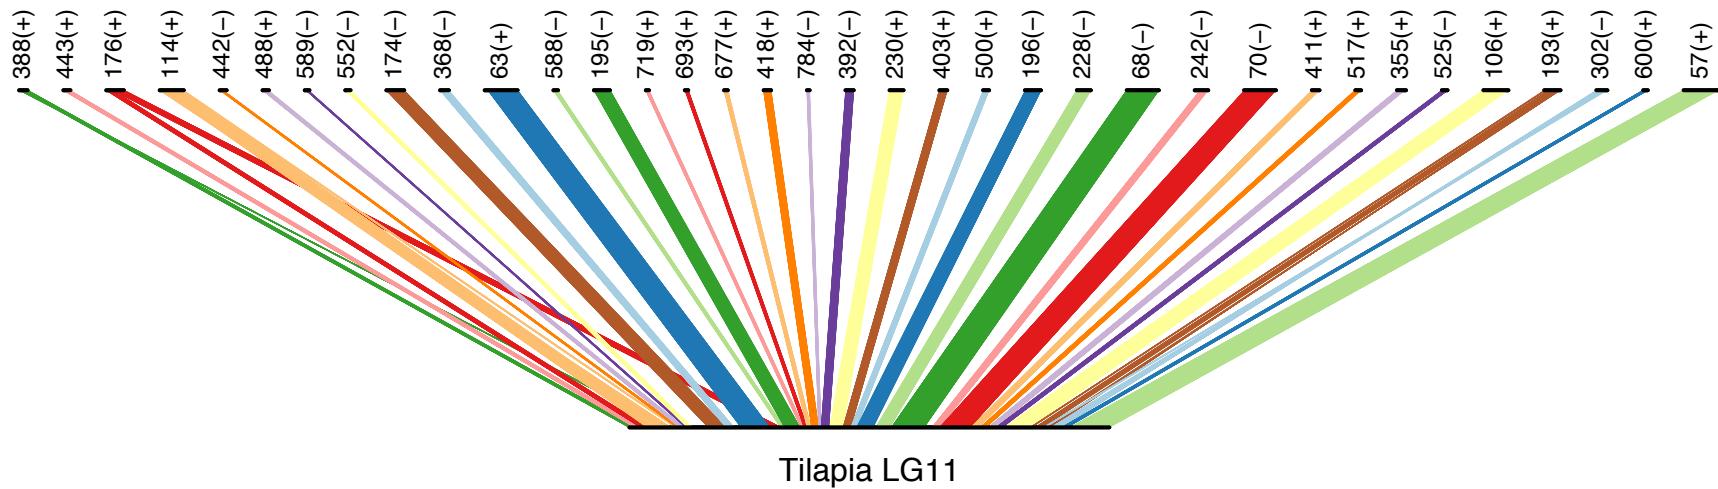

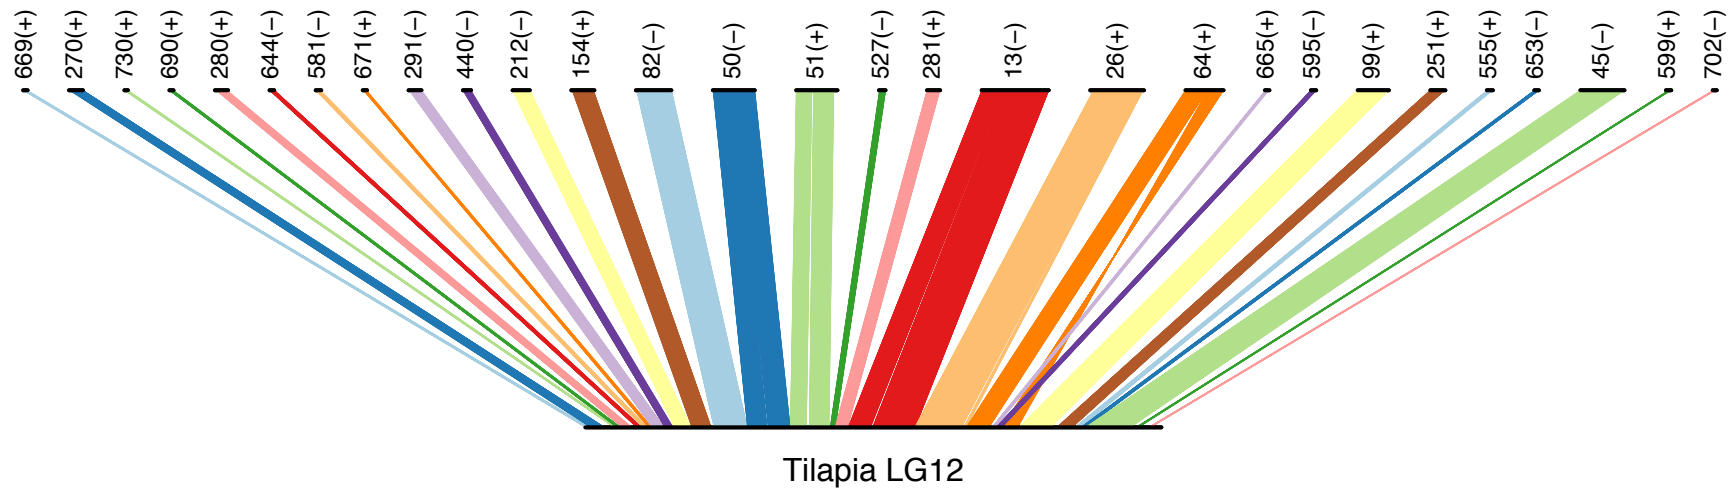

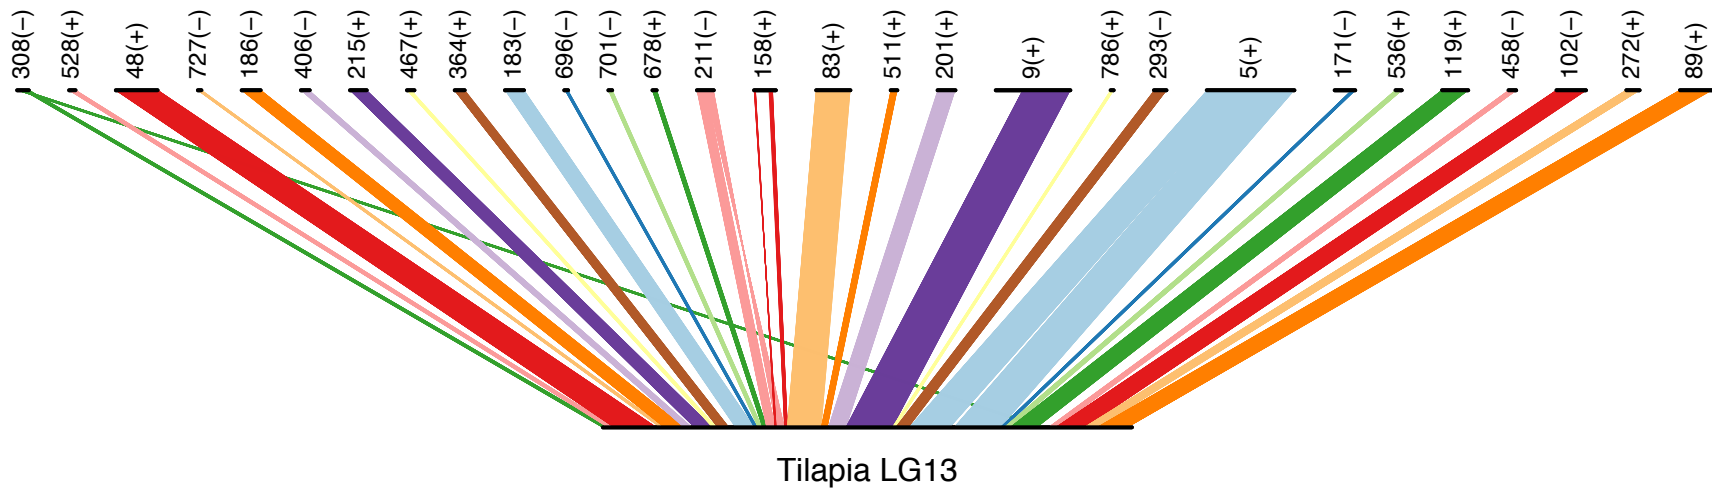

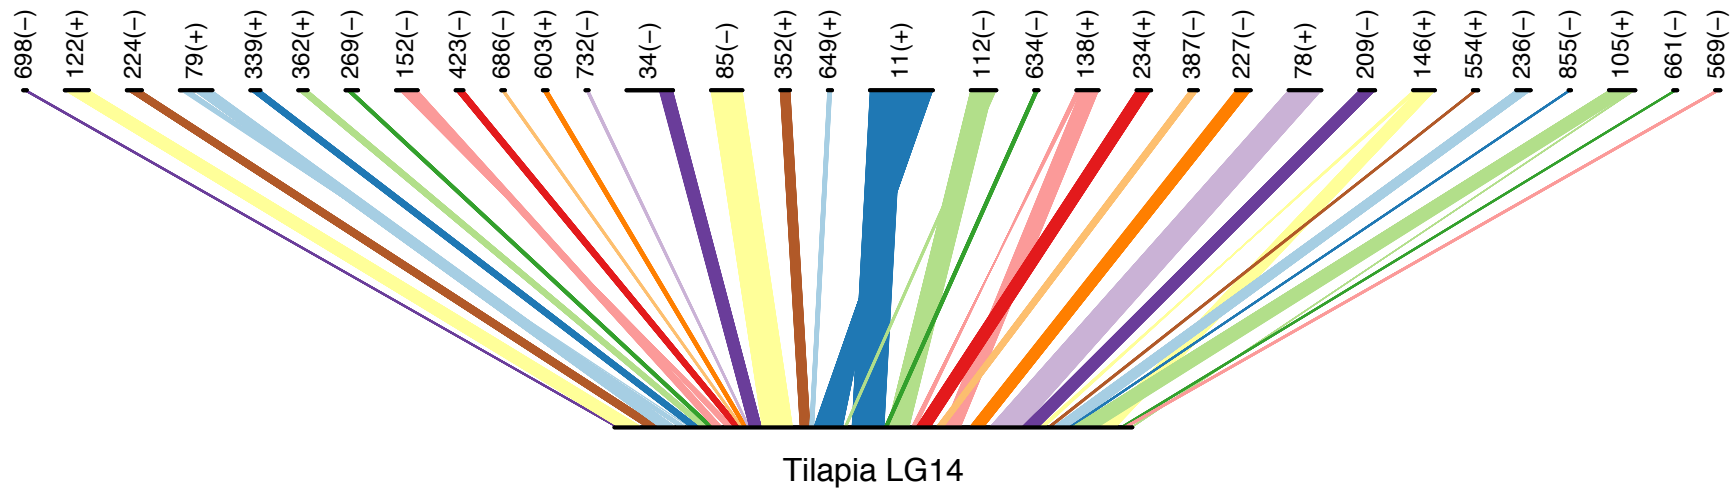

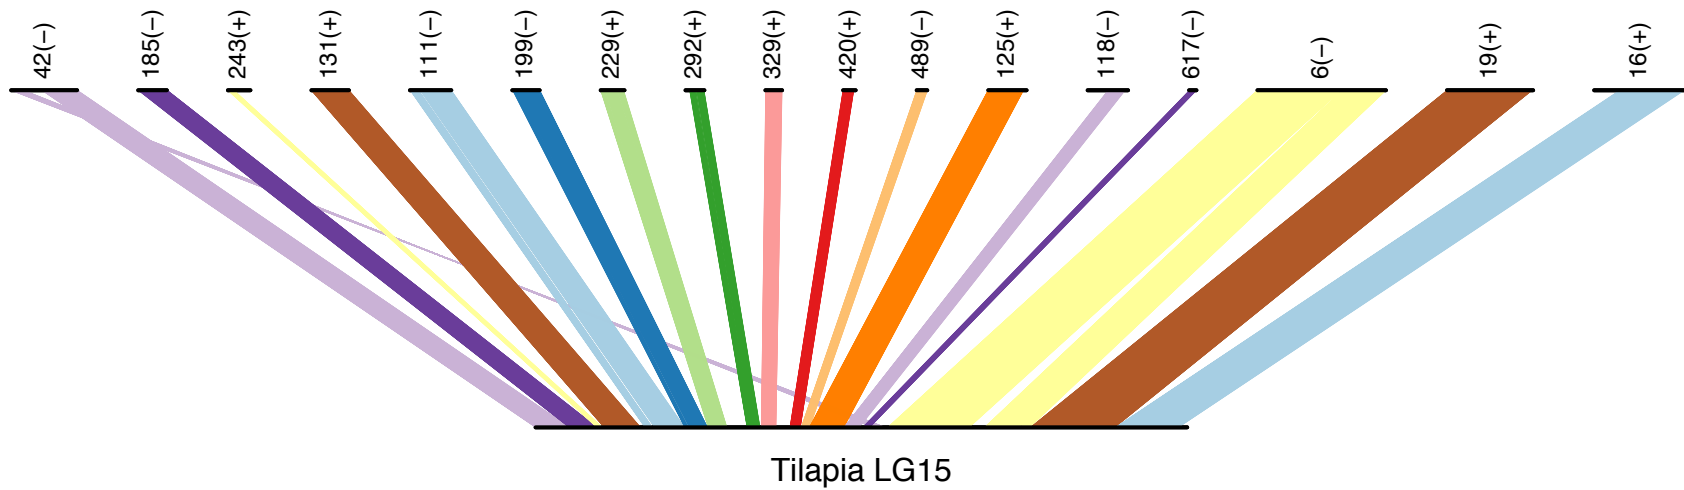

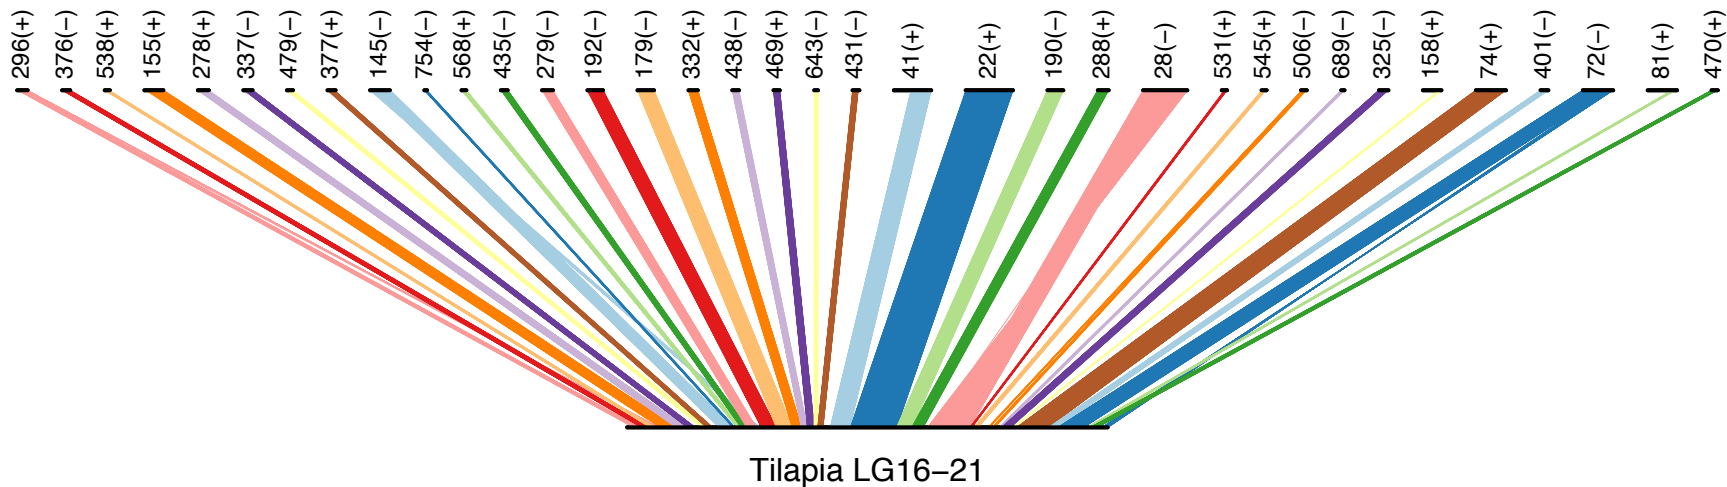



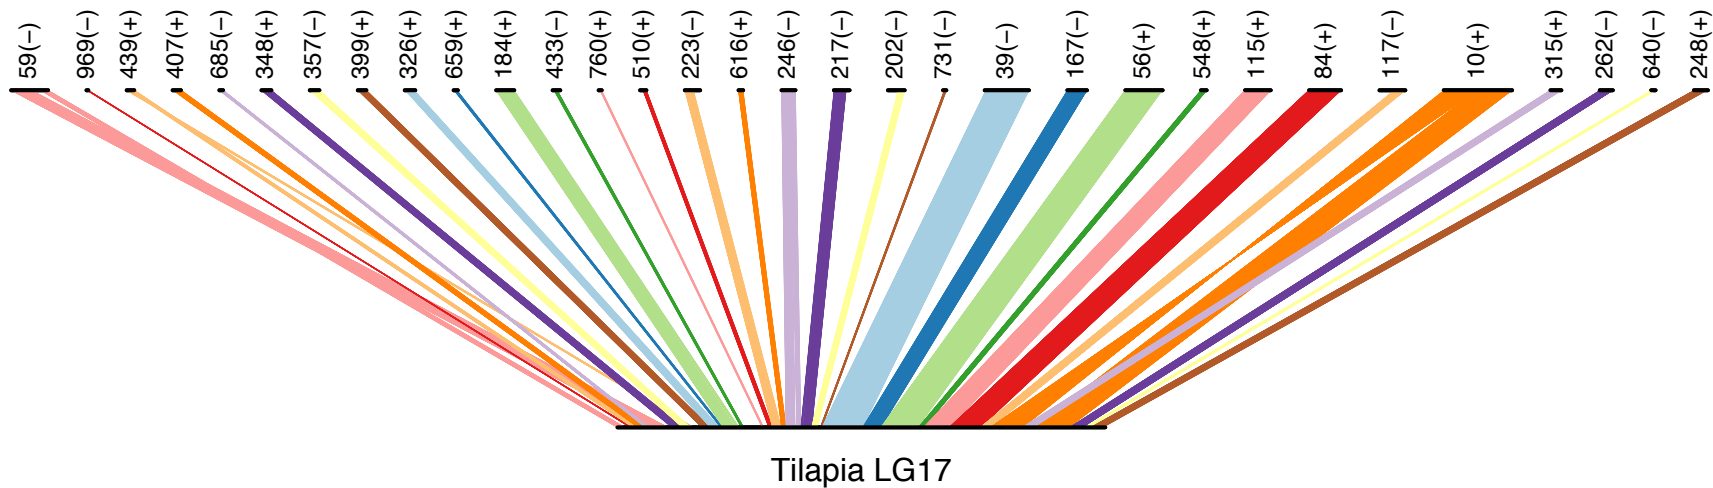

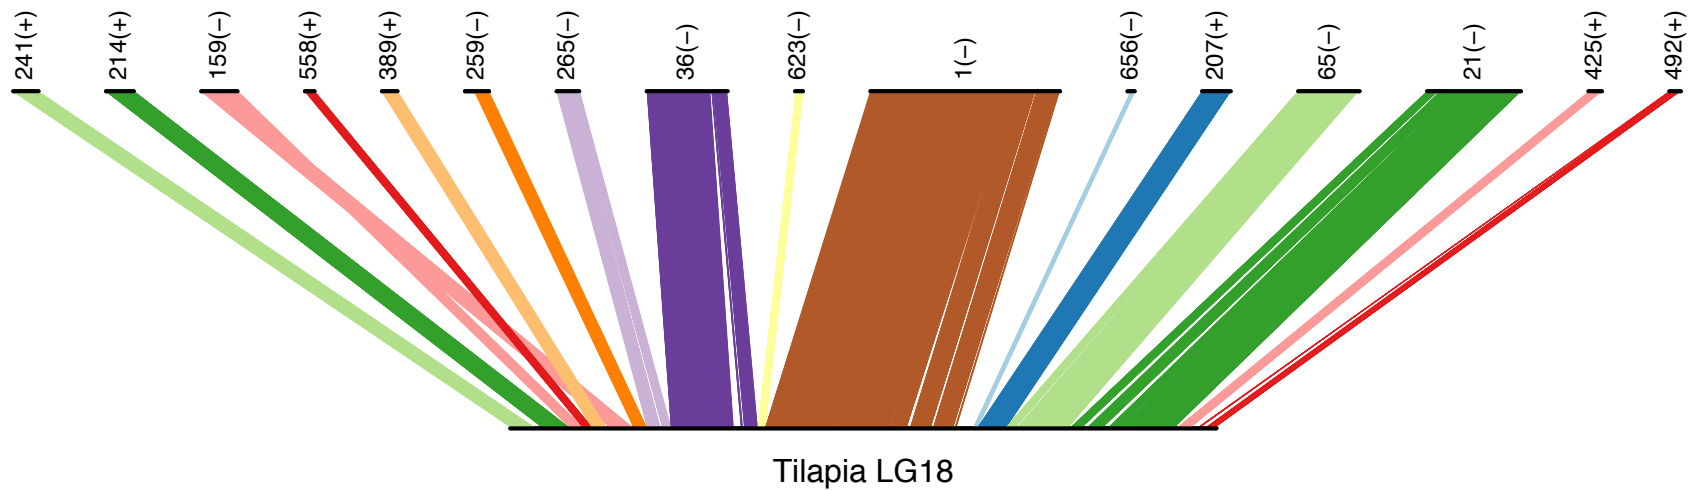

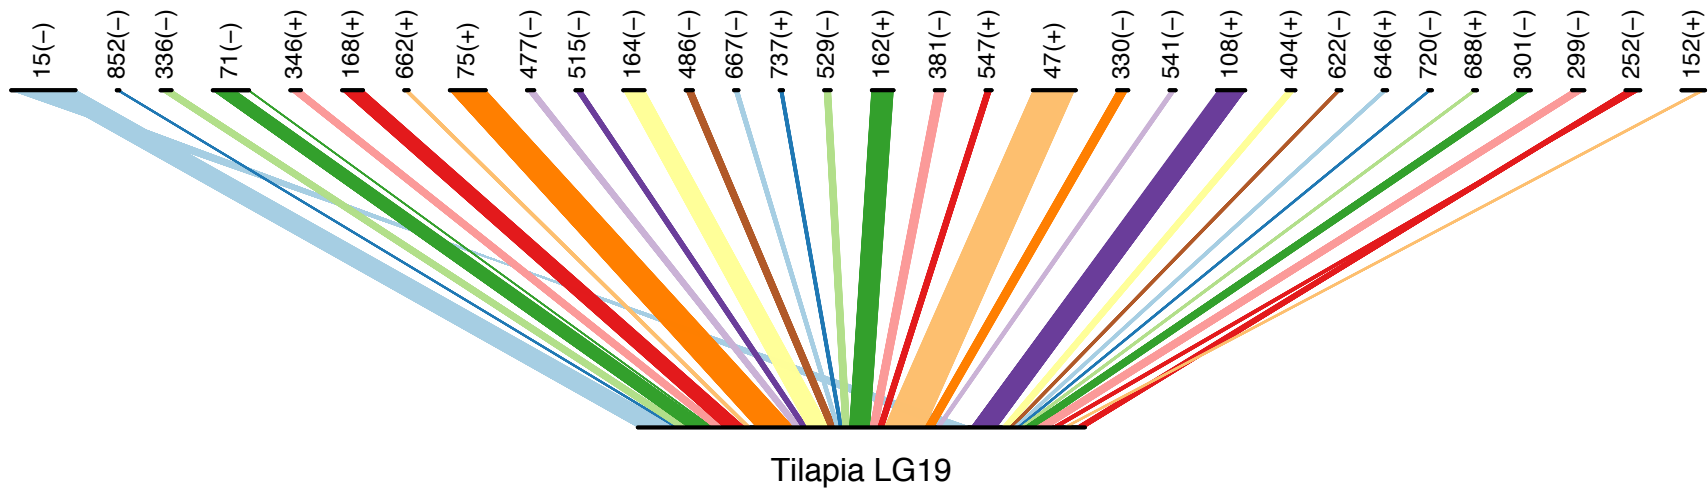

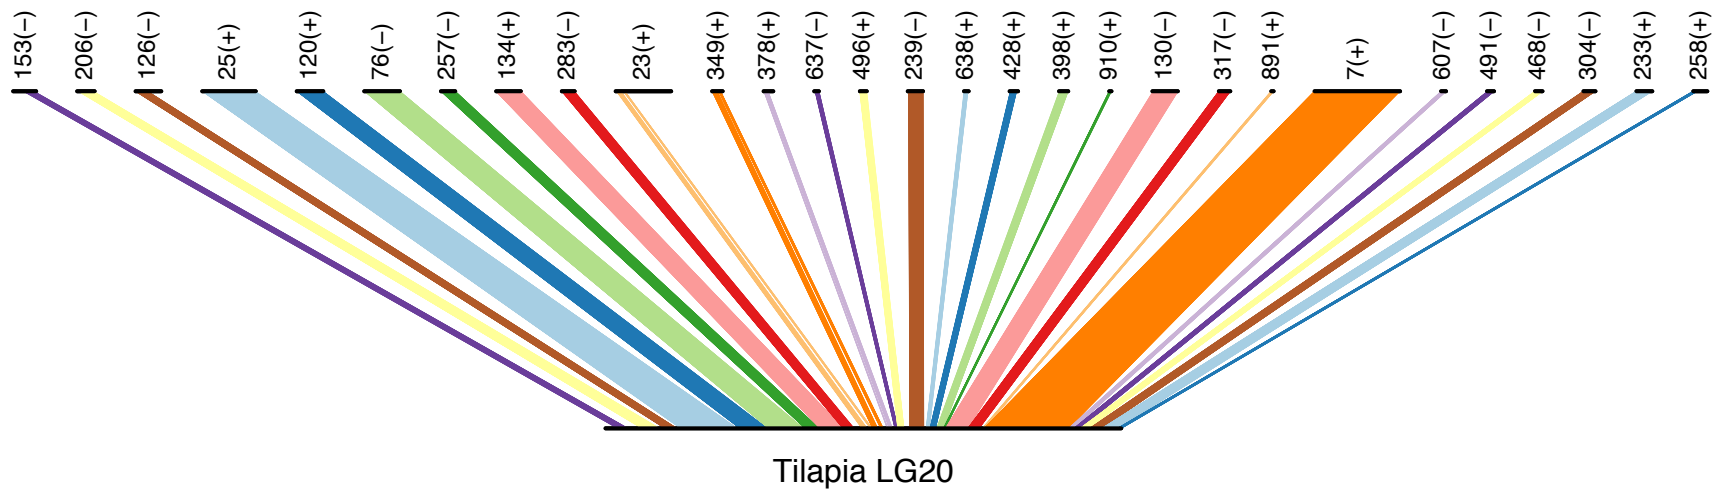

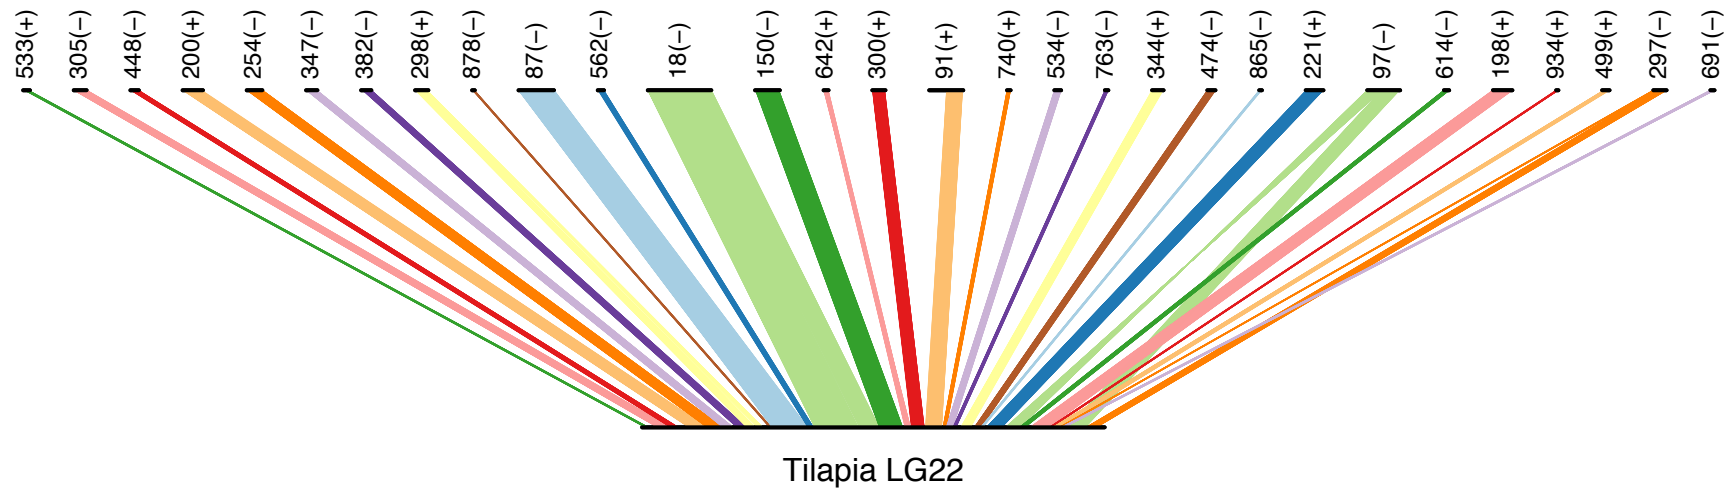

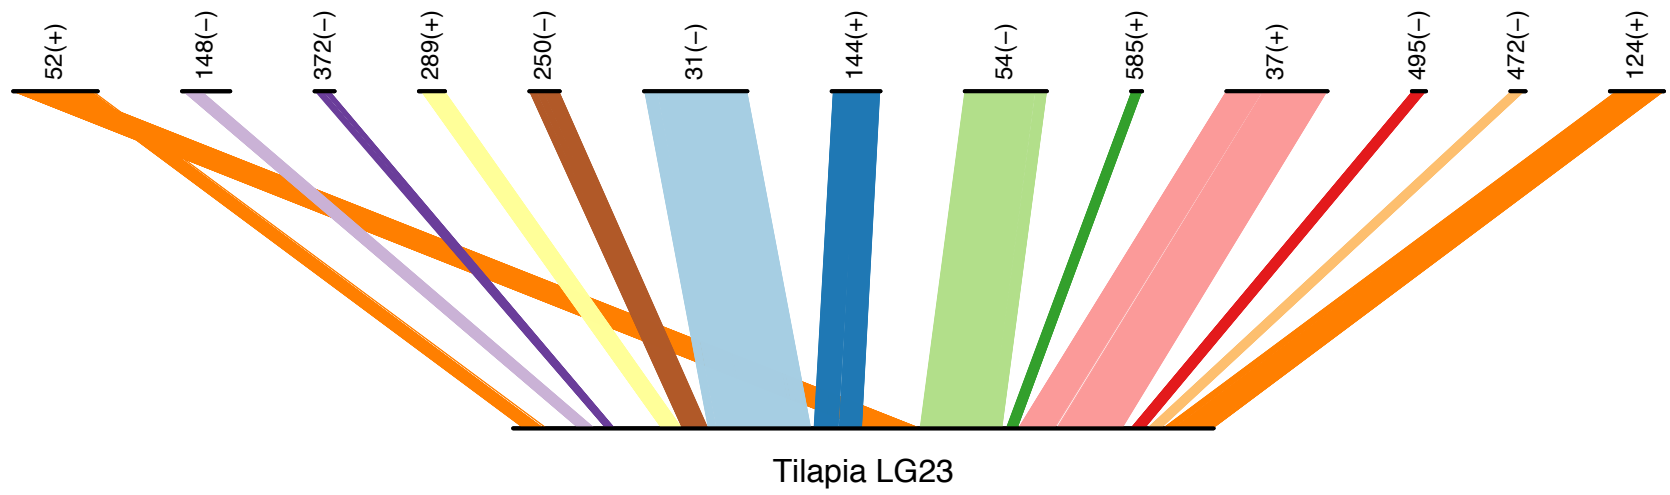

Supplement: 12864_2016_3177_MOESM1_ESM.pdf [file 12864_2016_3177_MOESM1_ESM.pdf]
