# Supplementary material for: Polygenic sex determination in the cichlid fish Astatotilapia burtoni
Source: PubMed Central journal article supplement (PMC5080751; doi:10.1186/s12864-016-3177-1), 2016-10-26
Supplement: 12864_2016_3177_MOESM2_ESM.pdf [file 12864_2016_3177_MOESM2_ESM.pdf]

A. burtoni

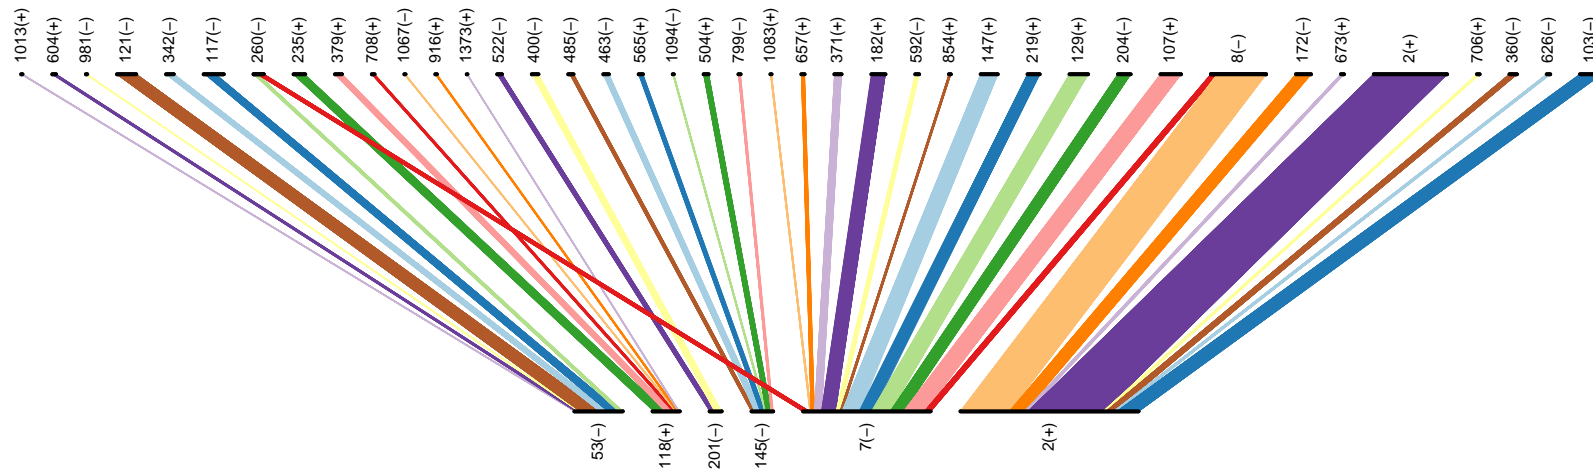

M. zebra LG1

# A. burtoni

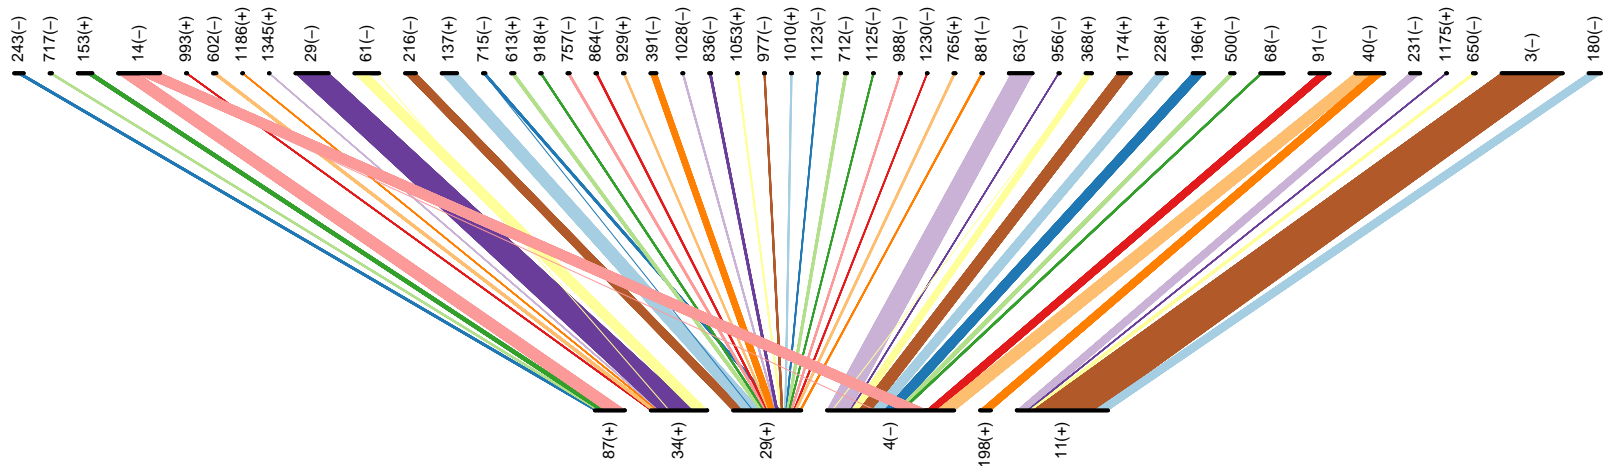

# M. zebra LG2

# A. burtoni

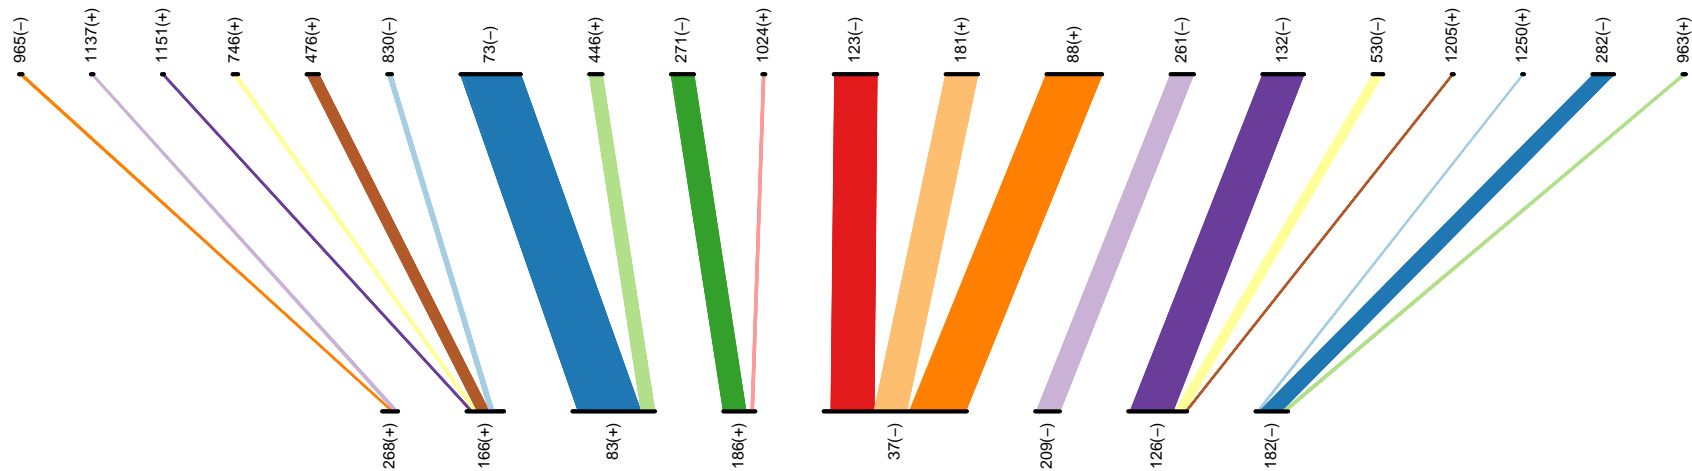

# M. zebra LG3

A. burtoni

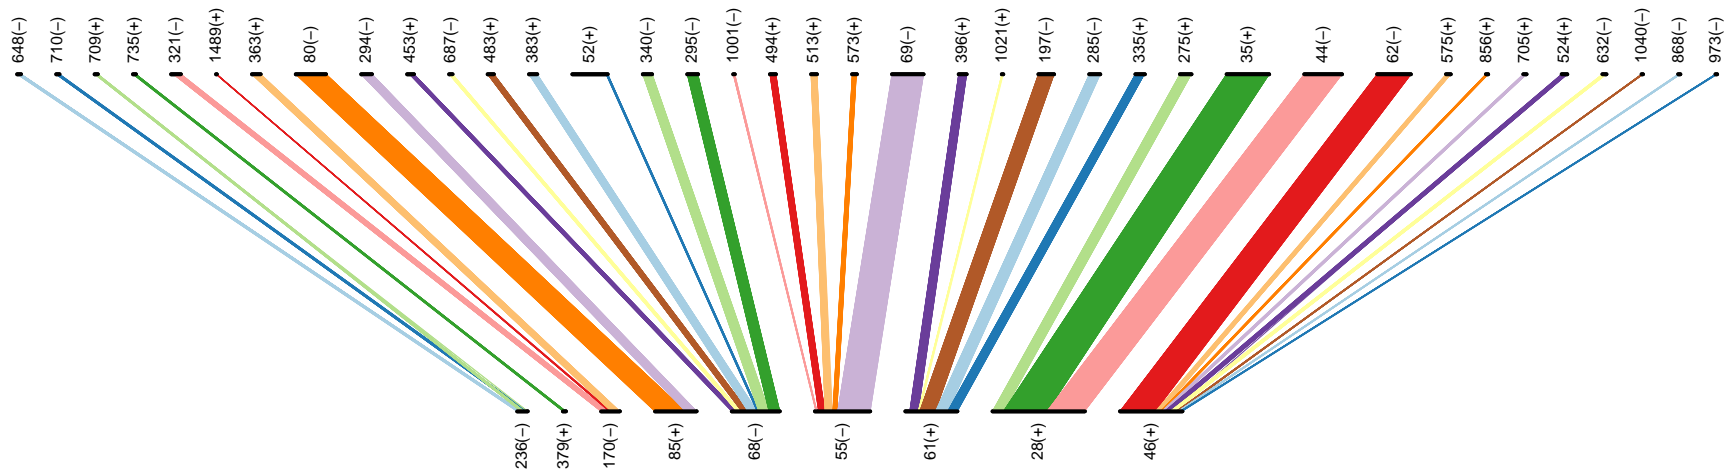

M. zebra LG4

A. burtoni

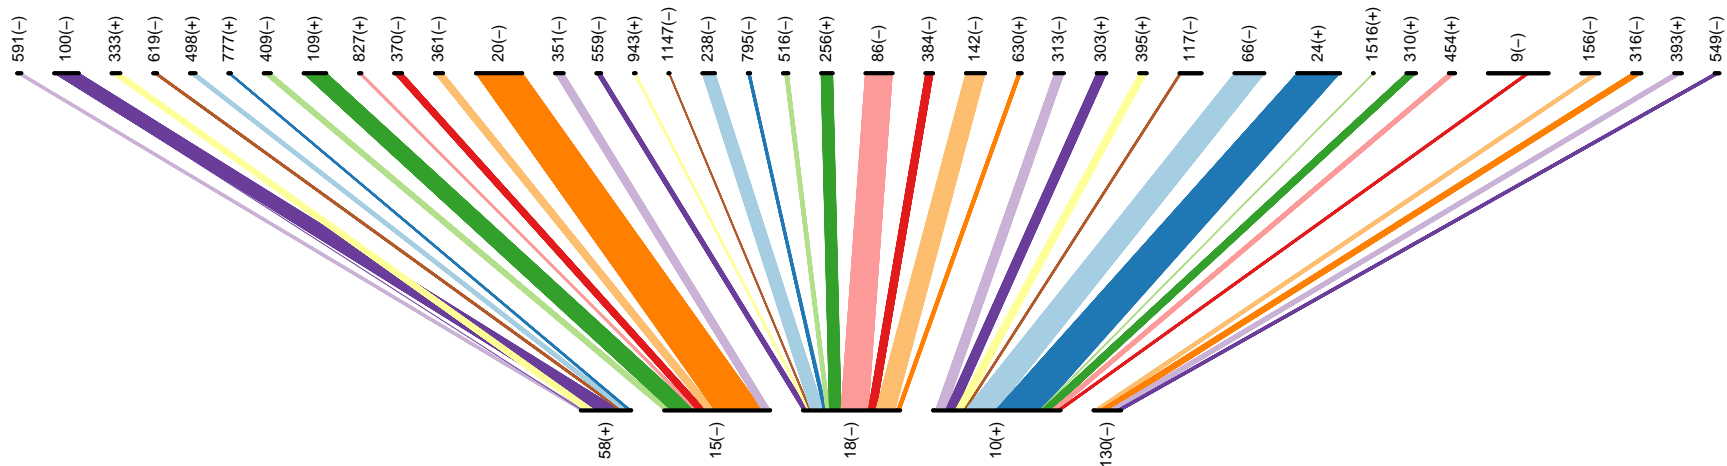

M. zebra LG5

A. burtoni

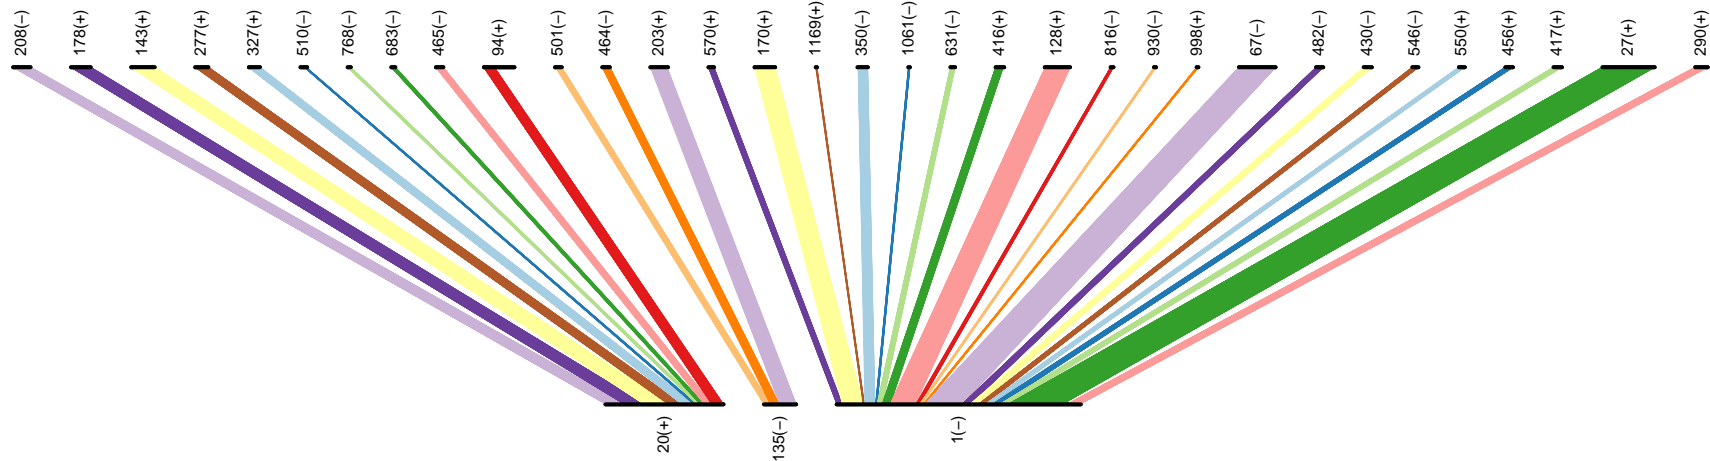

M. zebra LG6

A. burtoni

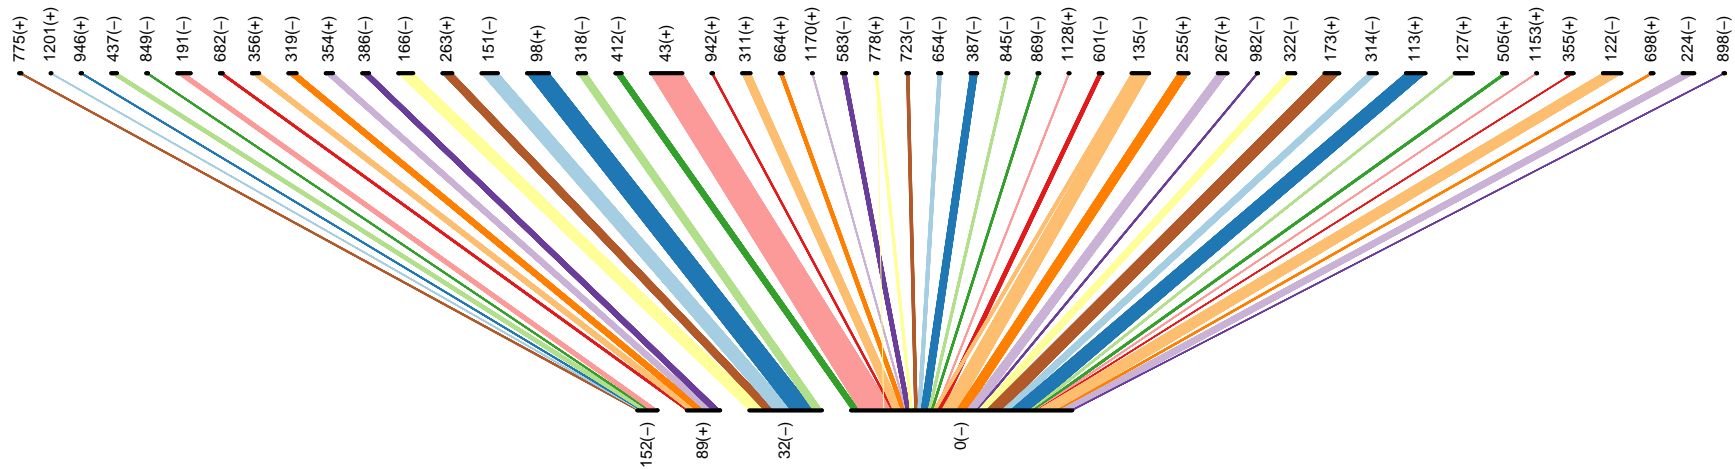

M. zebra LG7

*A. burtoni*

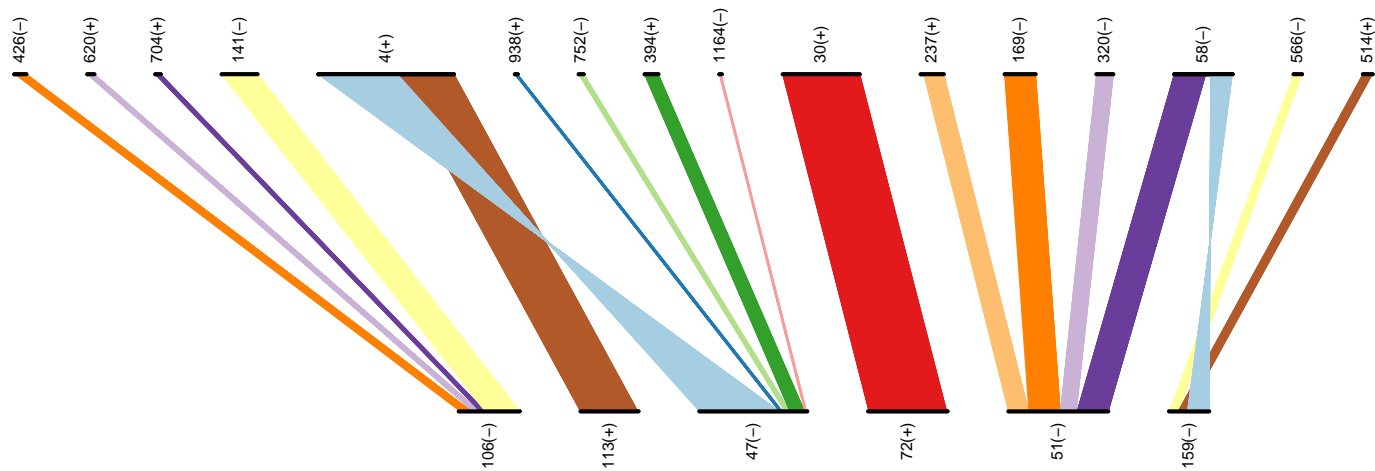

*M. zebra* LG8



*A. burtoni*

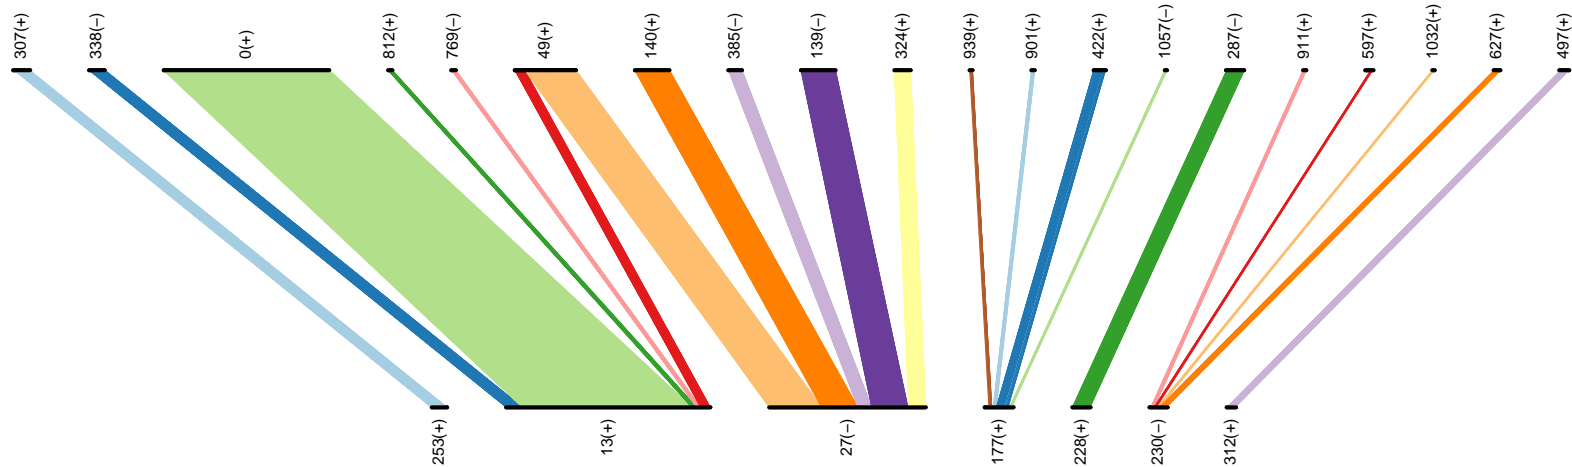

*M. zebra* LG9

*A. burtoni*

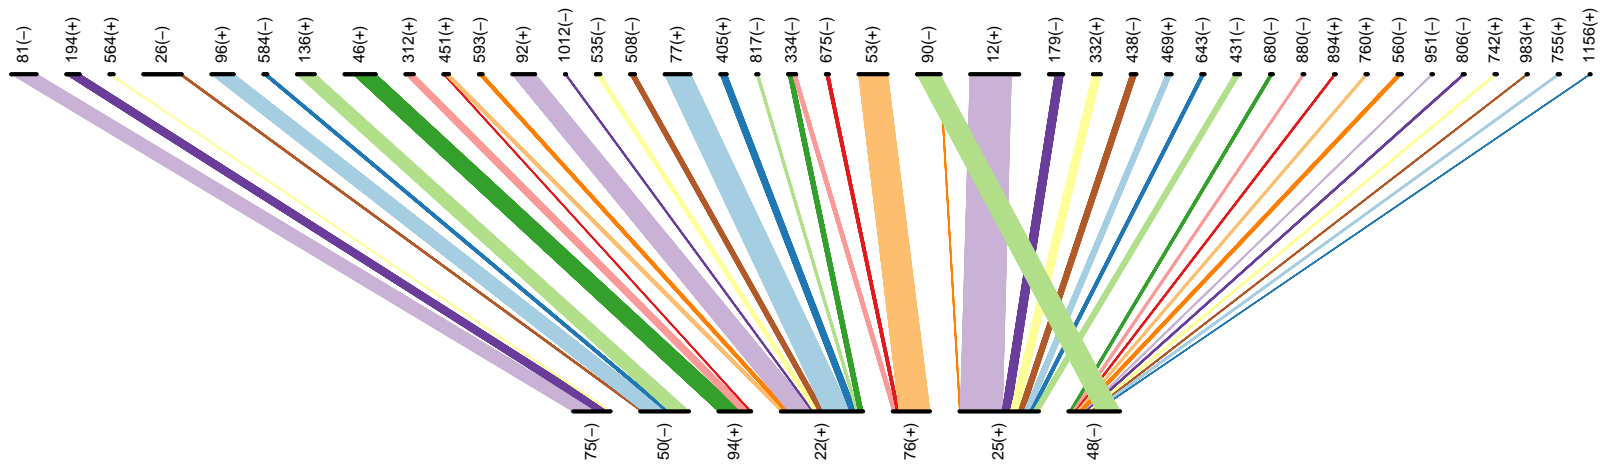

*M. zebra* LG10

# A. burtoni

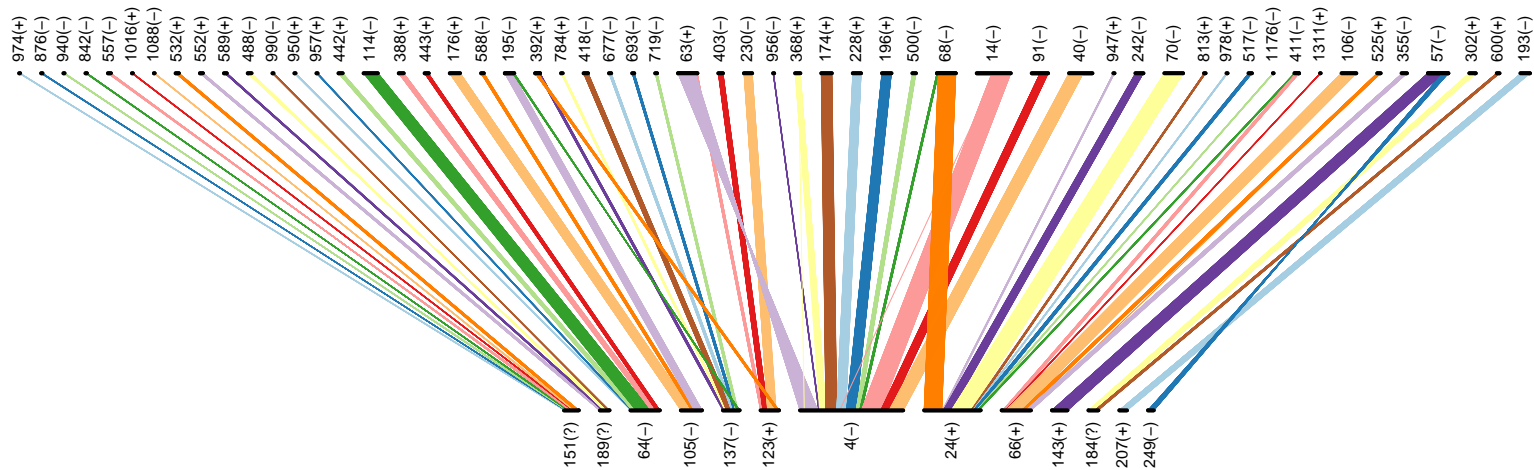

# M. zebra LG11

*A. burtoni*

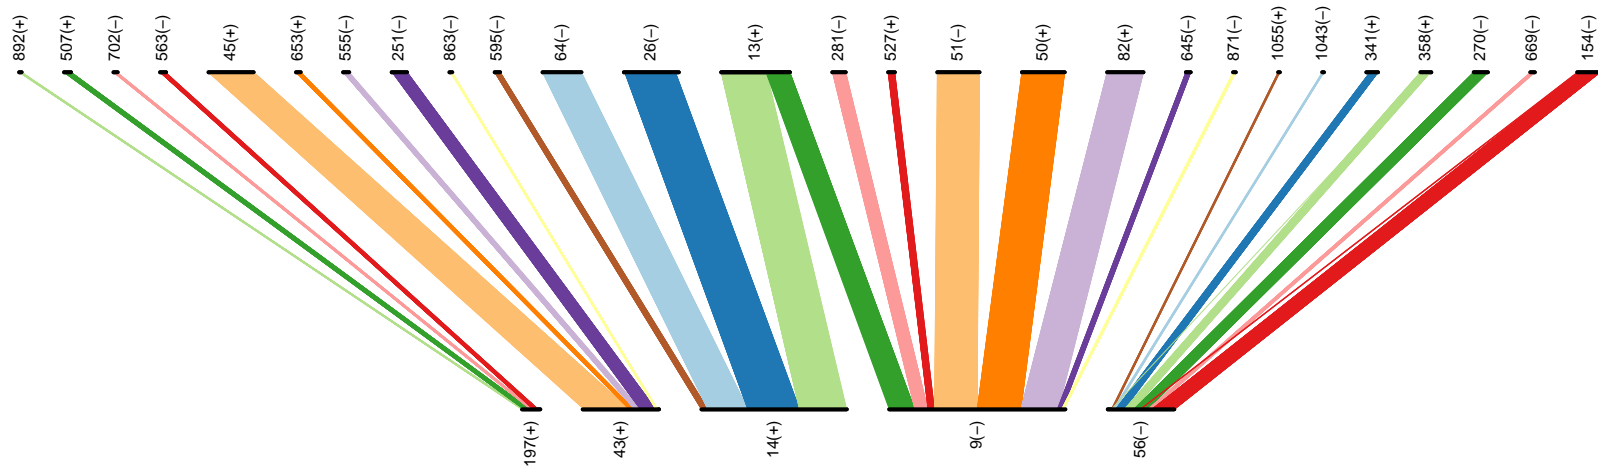

*M. zebra* LG12

*A. burtoni*

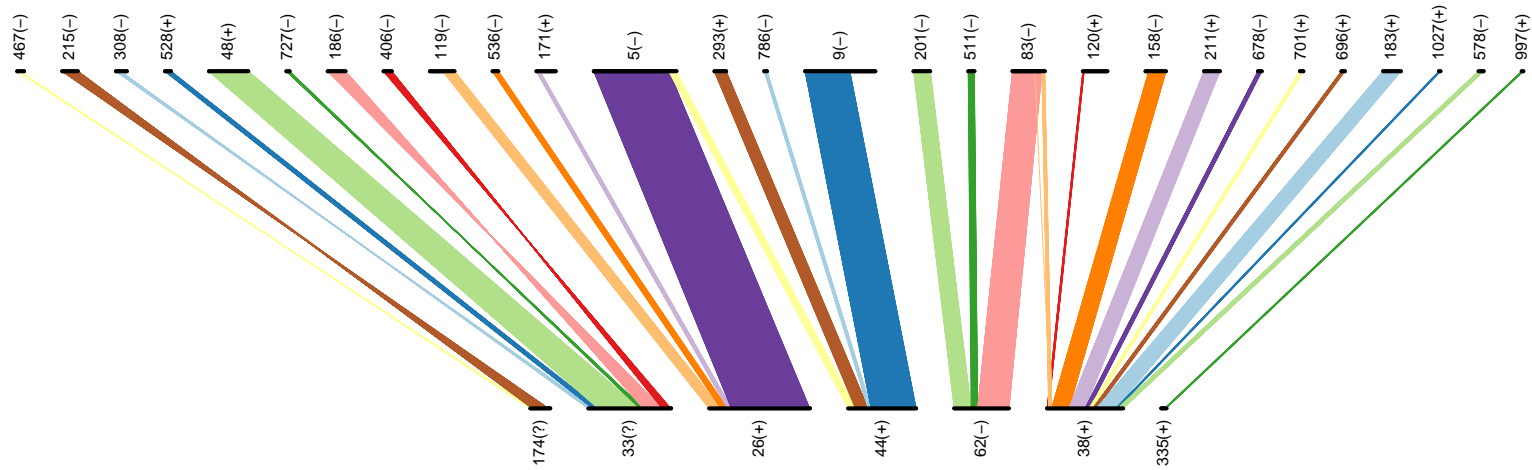

*M. zebra* LG13

A. burtoni

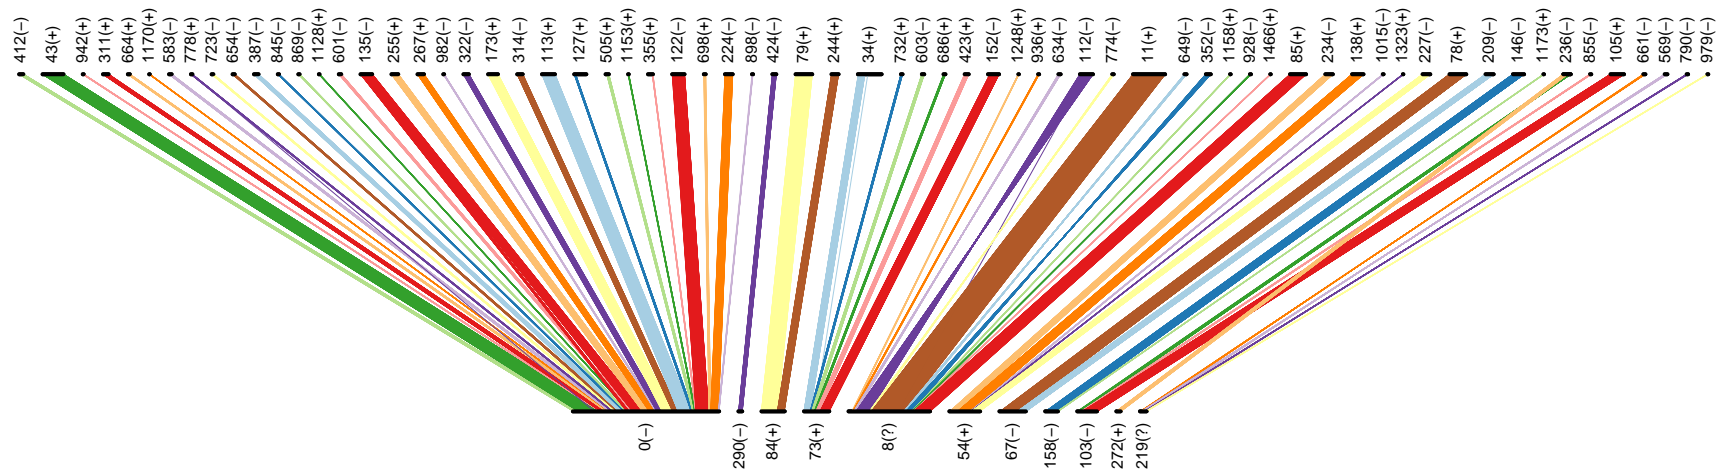

M. zebra LG14

*A. burtoni*

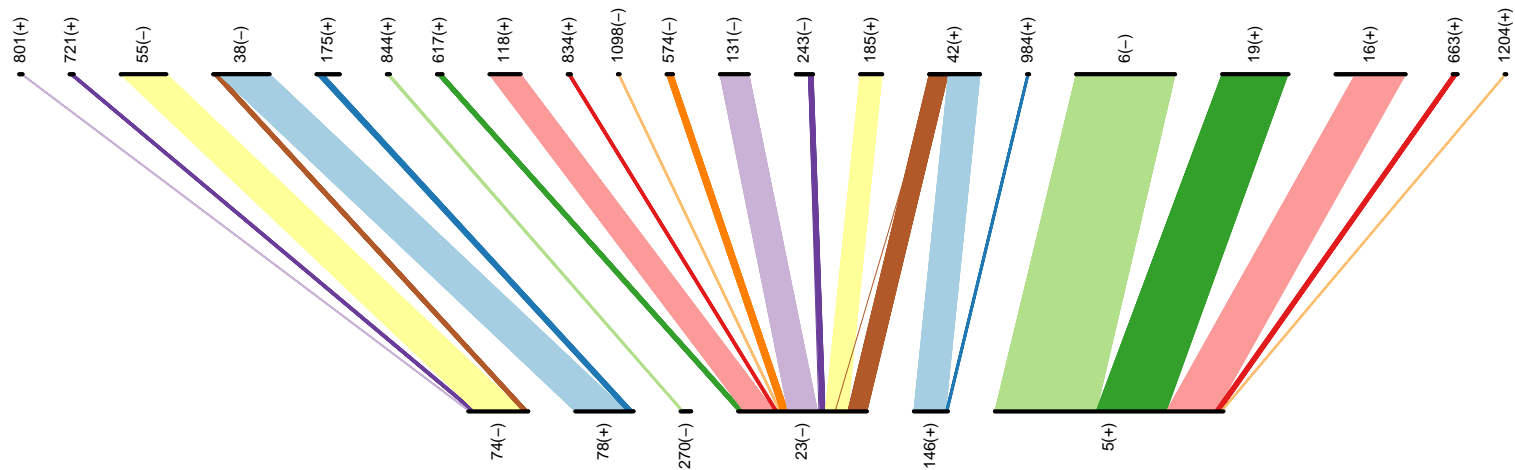

*M. zebra* LG15

A. burtoni

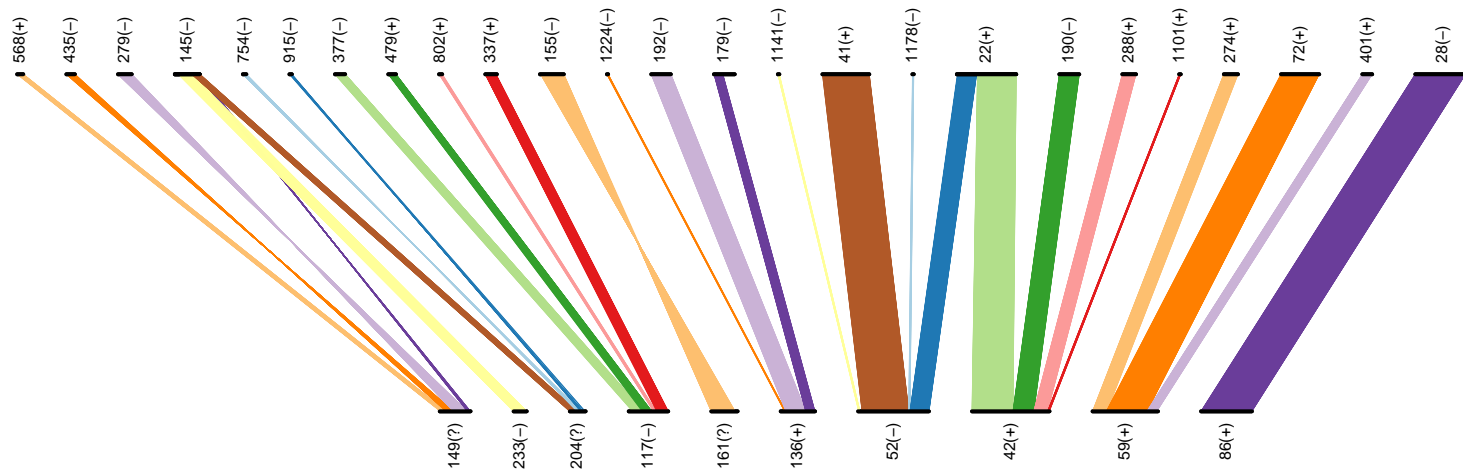

M. zebra LG16



*A. burtoni*

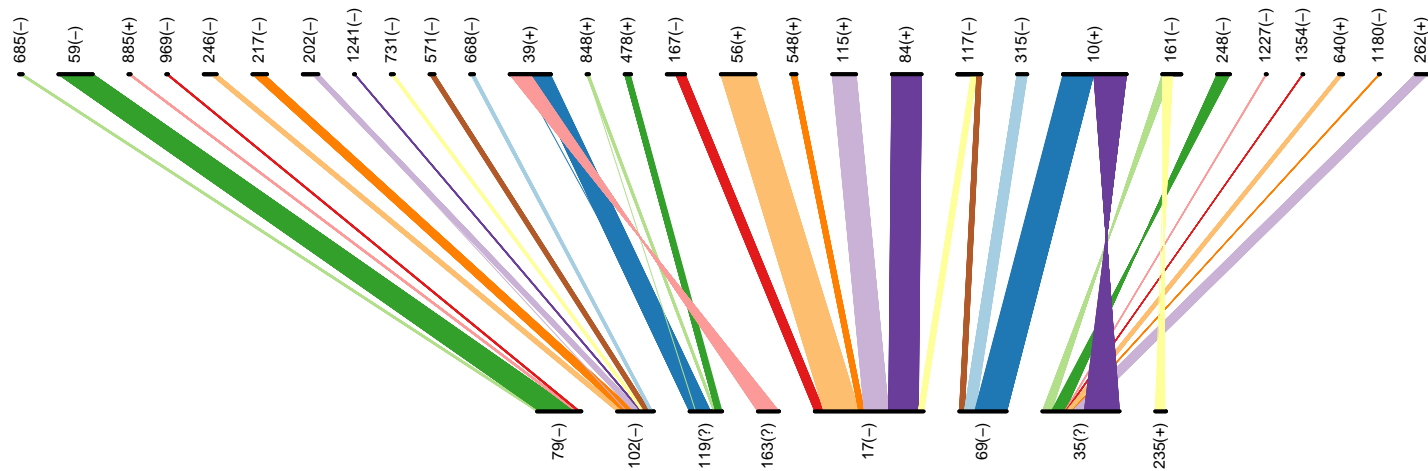

*M. zebra* LG17

A. burtoni

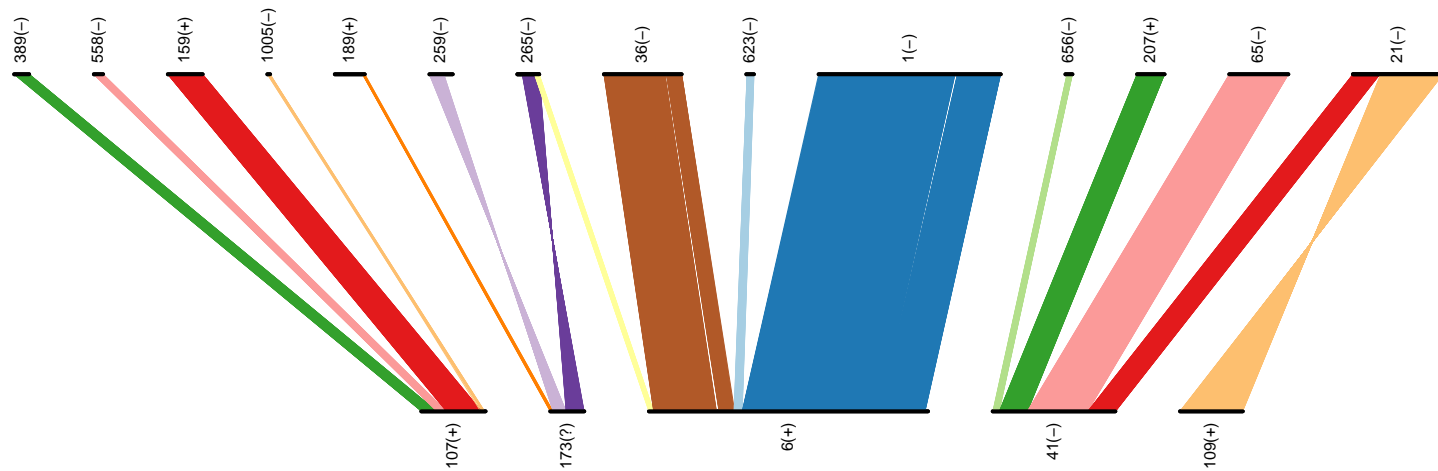

M. zebra LG18

A. burtoni

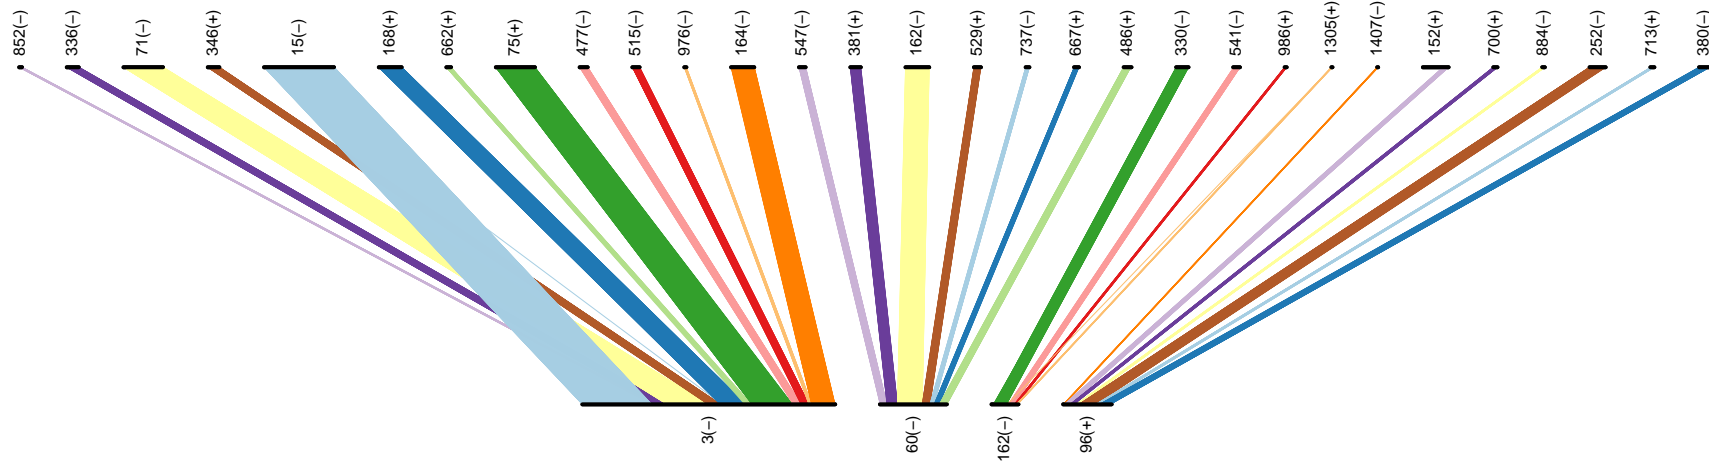

M. zebra LG19

*A. burtoni*

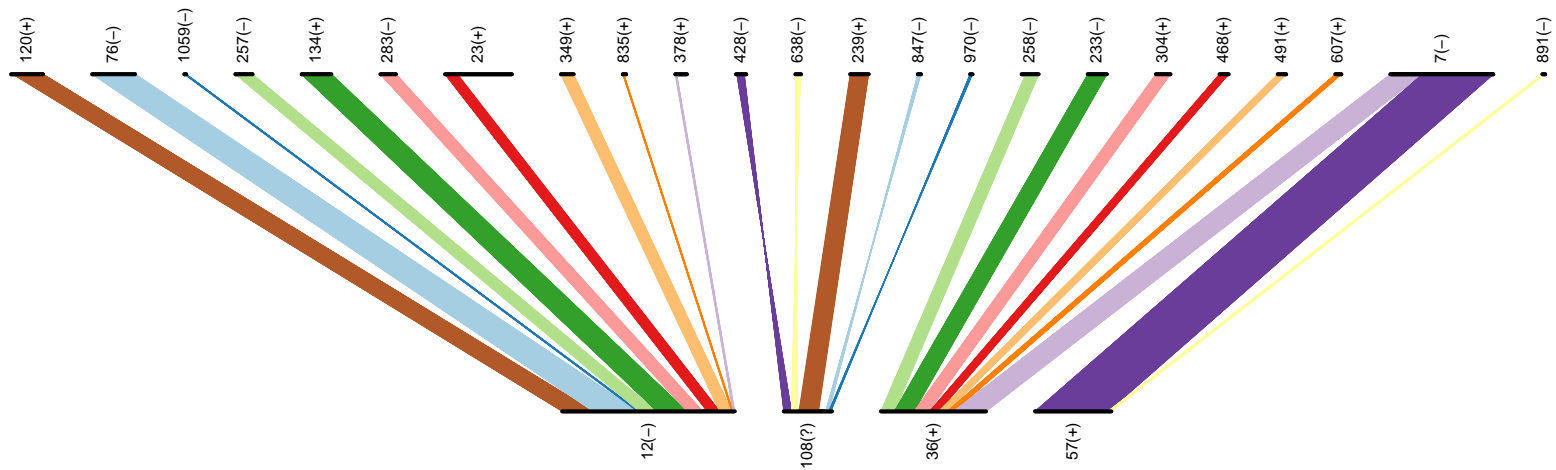

*M. zebra* LG20

*A. burtoni*

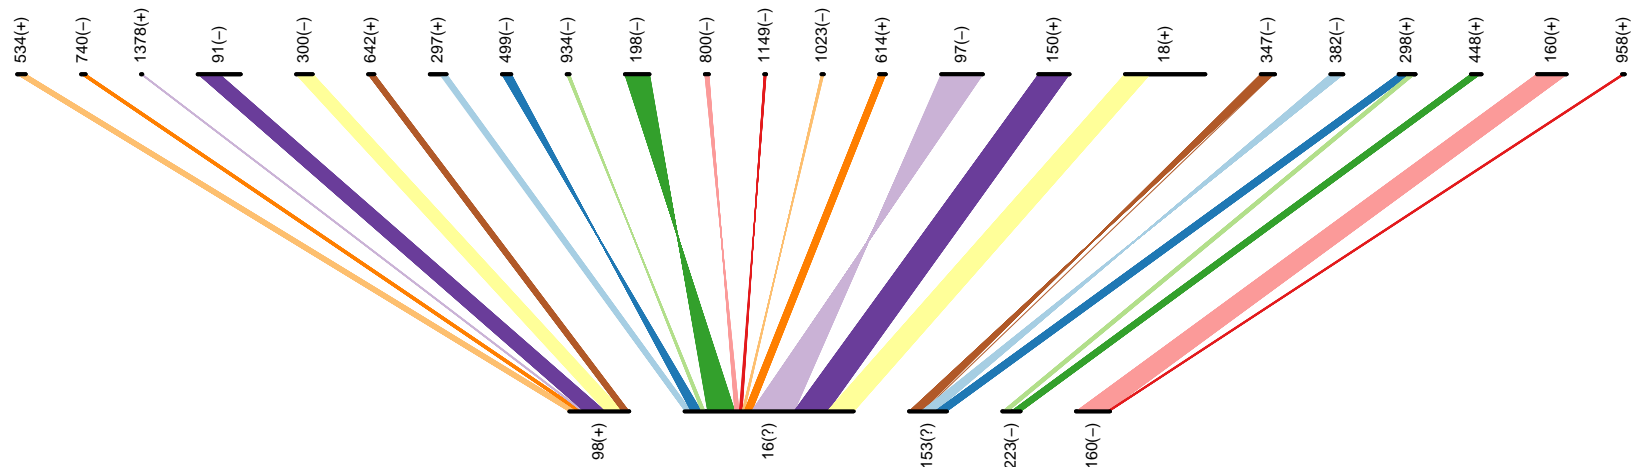

*M. zebra* LG22

*A. burtoni*

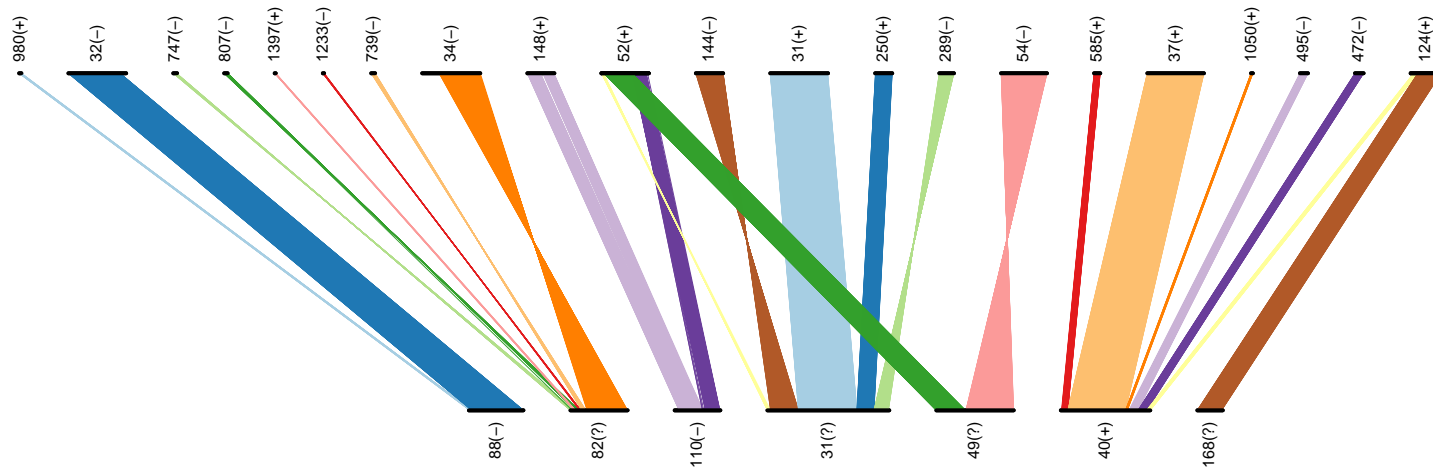

*M. zebra* LG23
